# Supplementary material for: Erinaceus coronavirus persistence in hedgehogs (Erinaceus europaeus) in a non-invasive, in vivo, experimental setting
Source: PubMed Central journal article supplement (PMC10545950; doi:10.3389/fvets.2023.1213990), 2023-09-15
Supplement: Table_1.pdf [file Table_1.pdf]

| Group<br>(sampling<br>days) | ID          | Sampling<br>days | Shedding<br>duration* | N.<br>Collected<br>Samples | N.<br>Positive<br>Samples | N.<br>Negative<br>Samples | Ratio<br>Sampling<br>days/N.<br>Collected<br>Samples | Max N.<br>consecutive<br>positive<br>samples** | N°<br>consecutive<br>positive<br>days§ | Intermittent |
|-----------------------------|-------------|------------------|-----------------------|----------------------------|---------------------------|---------------------------|------------------------------------------------------|------------------------------------------------|----------------------------------------|--------------|
| 10-20                       | Italy_RM40  | 11               | 6                     | 5                          | 3                         | 2                         | 2.20                                                 | 3                                              | 6                                      |              |
|                             | Italy_RM101 | 11               | 0                     | 5                          | 0                         | 5                         | 2.20                                                 |                                                |                                        |              |
|                             | Italy_RM103 | 11               | 0                     | 5                          | 1                         | 4                         | 2.20                                                 |                                                |                                        |              |
|                             | Italy_RM15  | 13               | 13                    | 5                          | 2                         | 3                         | 2.60                                                 |                                                |                                        | Y            |
|                             | Italy_RM51  | 13               | 4                     | 7                          | 3                         | 4                         | 1.85                                                 | 3                                              | 4                                      |              |
|                             | Italy_RM11  | 15               | 3                     | 6                          | 2                         | 4                         | 2.50                                                 | 2                                              | 3                                      |              |
|                             | Italy_RM70  | 15               | 15                    | 7                          | 7                         | 0                         | 2.10                                                 | 7                                              | 15                                     |              |
|                             | Italy_RM77  | 15               | 7                     | 5                          | 3                         | 2                         | 3.00                                                 | 3                                              | 7                                      |              |
|                             | Italy_RM64  | 15               | 11                    | 5                          | 3                         | 2                         | 3.00                                                 |                                                |                                        | Y            |
|                             | Italy_RM58  | 16               | 16                    | 6                          | 6                         | 0                         | 2.66                                                 | 6                                              | 16                                     |              |
|                             | Italy_RM36  | 17               | 17                    | 6                          | 6                         | 0                         | 2.80                                                 | 6                                              | 17                                     |              |
|                             | Italy_RM56  | 17               | 15                    | 7                          | 1                         | 6                         | 2.40                                                 | 7                                              | 16                                     |              |
|                             | Italy_RM69  | 17               | 13                    | 7                          | 1                         | 6                         | 2.40                                                 | 6                                              | 13                                     |              |
|                             | Italy_RM63  | 18               | 18                    | 7                          | 7                         | 0                         | 2.57                                                 | 7                                              | 18                                     |              |
|                             | Italy_RM39  | 20               | 16                    | 8                          | 7                         | 1                         | 2.50                                                 | 7                                              | 16                                     |              |
|                             | Italy_RM75  | 20               | 0                     | 9                          | 0                         | 9                         | 2.20                                                 |                                                |                                        |              |
| >21                         | Italy_RM10  | 21               | 0                     | 8                          | 1                         | 7                         | 2.60                                                 |                                                |                                        |              |
|                             | Italy_RM47  | 22               | 22                    | 9                          | 8                         | 1                         | 2.40                                                 | 6                                              | 17                                     | Y            |
|                             | Italy_RM30  | 23               | 9                     | 11                         | 4                         | 7                         | 2.10                                                 | 3                                              | 5                                      | Y            |
|                             | Italy_RM49  | 23               | 23                    | 8                          | 5                         | 3                         | 2.80                                                 | 4                                              | 14                                     | Y            |
|                             | Italy_RM50  | 23               | 23                    | 9                          | 6                         | 3                         | 2.50                                                 | 4                                              | 6                                      | Y            |
|                             | Italy_RM31  | 26               | 26                    | 10                         | 6                         | 4                         | 2.60                                                 | 2                                              | 4                                      | Y            |
|                             | Italy_RM13  | 27               | 0                     | 10                         | 0                         | 10                        | 2.70                                                 |                                                |                                        |              |
|                             | Italy_RM61  | 28               | 15                    | 11                         | 4                         | 7                         | 2.50                                                 | 2                                              | 3                                      | Y            |
|                             | Italy_RM12  | 29               | 13                    | 10                         | 4                         | 6                         | 2.90                                                 | 3                                              | 5                                      | Y            |
|                             | Italy_RM32  | 33               | 31                    | 12                         | 7                         | 5                         | 2.75                                                 | 3                                              | 6                                      | Y            |
|                             | Italy_RM73  | 34               | 29                    | 14                         | 12                        | 2                         | 2.40                                                 | 12                                             | 29                                     |              |
|                             | Italy_RM45  | 37               | 37                    | 14                         | 14                        | 0                         | 2.60                                                 | 14                                             | 37                                     |              |
|                             | Italy_RM8   | 62               | 50                    | 23                         | 17                        | 6                         | 2.70                                                 | 6                                              | 7                                      | Y            |
|                             | Italy_RM5   | 62               | 62                    | 24                         | 11                        | 13                        | 2.60                                                 | 8                                              | 15                                     | Y            |
|                             | Italy_RM6   | 62               | 62                    | 22                         | 13                        | 9                         | 2.80                                                 | 7                                              | 13                                     | Y            |
| Italy_RM38                  | 62          | 62               | 23                    | 17                         | 6                         | 2.70                      | 6                                                    | 13                                             | Y                                      |              |

\*number of days between the first and the last positive fecal sample

\*\* number of consecutive positive samples

§number of days between the first and the last consecutive positive fecal samples

Y: intermittent shedding
